# Supplementary material for: Fecal microbiome signatures of pancreatic cancer patients
Source: PubMed Central journal article supplement (PMC6856127; doi:10.1038/s41598-019-53041-4), 2019-11-14

# Fecal microbiome signatures of pancreatic cancer patients

Elizabeth Half<sup>1\*</sup>, Nirit Keren<sup>2\*</sup>, Leah Reshef<sup>2</sup>, Tatiana Dorfman<sup>3</sup>, Ishai Lachter<sup>1</sup>, Yoram Kluger<sup>3</sup>, Naama Reshef<sup>4</sup>, Hilla Knobler<sup>4</sup>, Yaakov Maor<sup>5</sup>, Assaf Stein<sup>6</sup>, Fred M Konikoff<sup>6,7</sup>, and Uri Gophna<sup>\*\*2</sup>

<sup>1</sup>Department of Gastroenterology, Rambam Health Care Campus; <sup>2</sup>Department of Molecular Microbiology and Biotechnology, George S. Wise Faculty of Life Sciences; <sup>3</sup>Department of General Surgery, Rambam Health Care Campus; <sup>4</sup>Diabetes, Metabolic and Endocrinology Institute, Kaplan Medical Center, Rehovot, Israel; <sup>5</sup>Institute of Gastroenterology and Hepatology, Kaplan Medical Center, Rehovot; <sup>6</sup>Department of Gastroenterology and Hepatology, Meir Medical Center, Kfar Saba; <sup>7</sup>Sackler Faculty of Medicine, Tel Aviv University, Israel

\*Equal Contributors

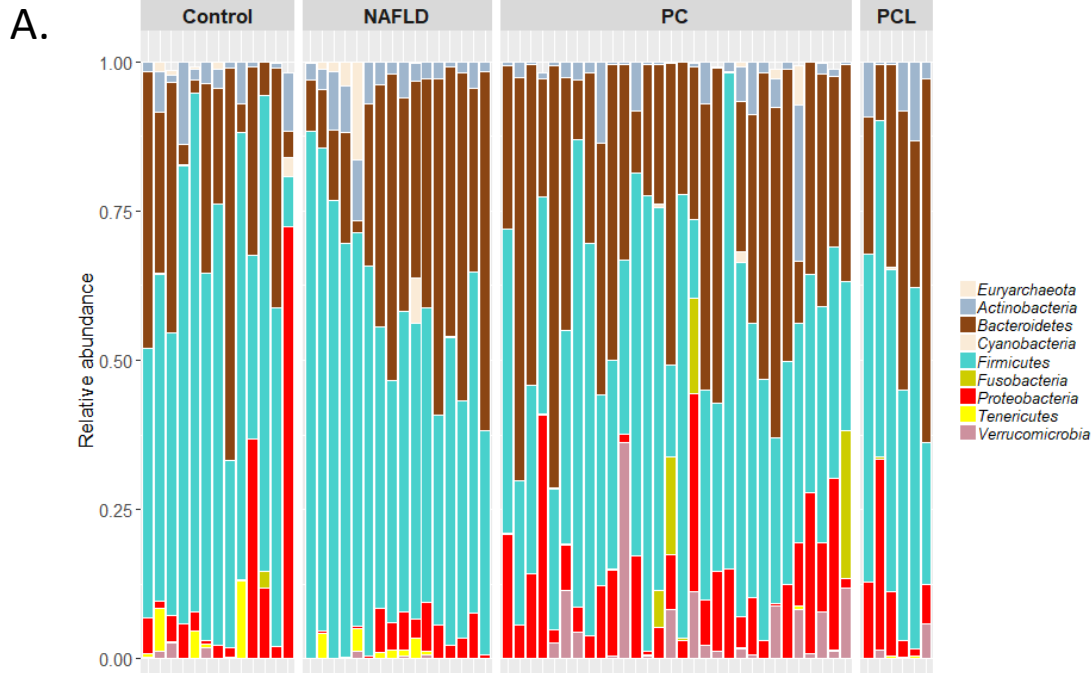

Figure S1. Full taxonomic profiles of all samples used in this study.

A. Phyla level; B. Order level; C. Family level; D. Genus level. Taxa whose relative abundance was below 3% across all the samples are not shown. The main phyla, orders and families of the gut are color coded: genera, families and orders of the Bacteroidetes are in shades of brown; genera and families of the *Clostridiales* order (belonging to the Firmicutes phylum) are in shades of blue and green.

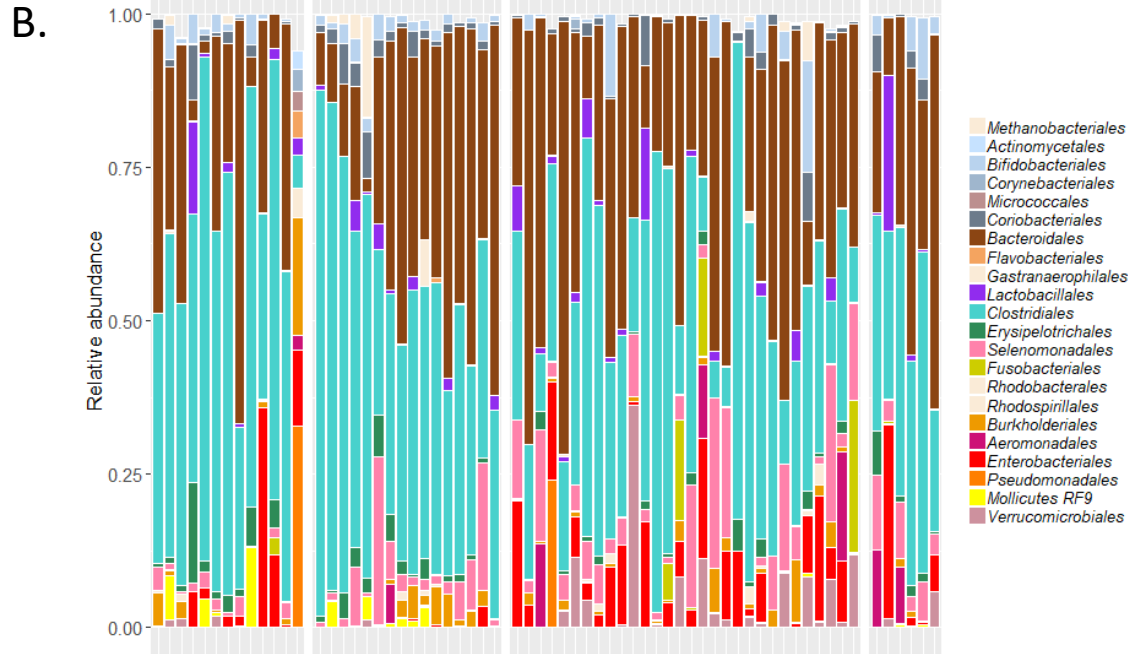

C.

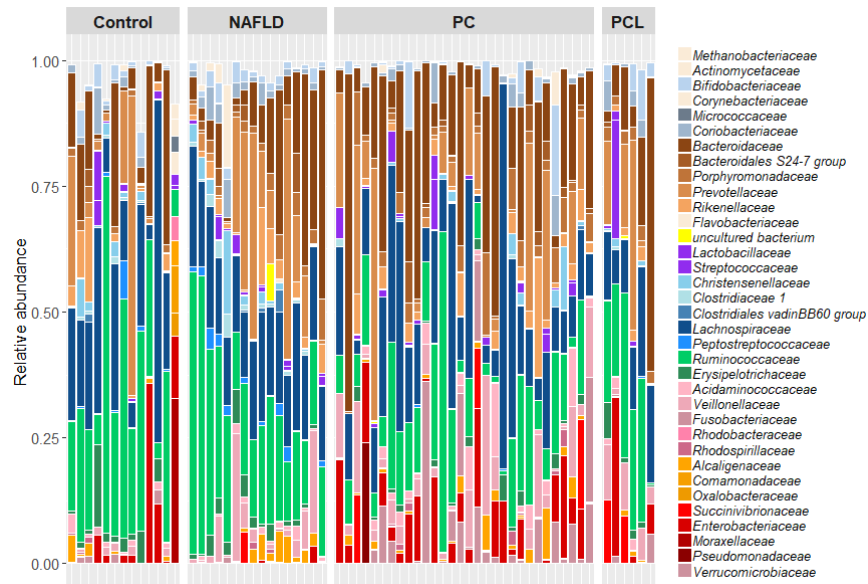

D.

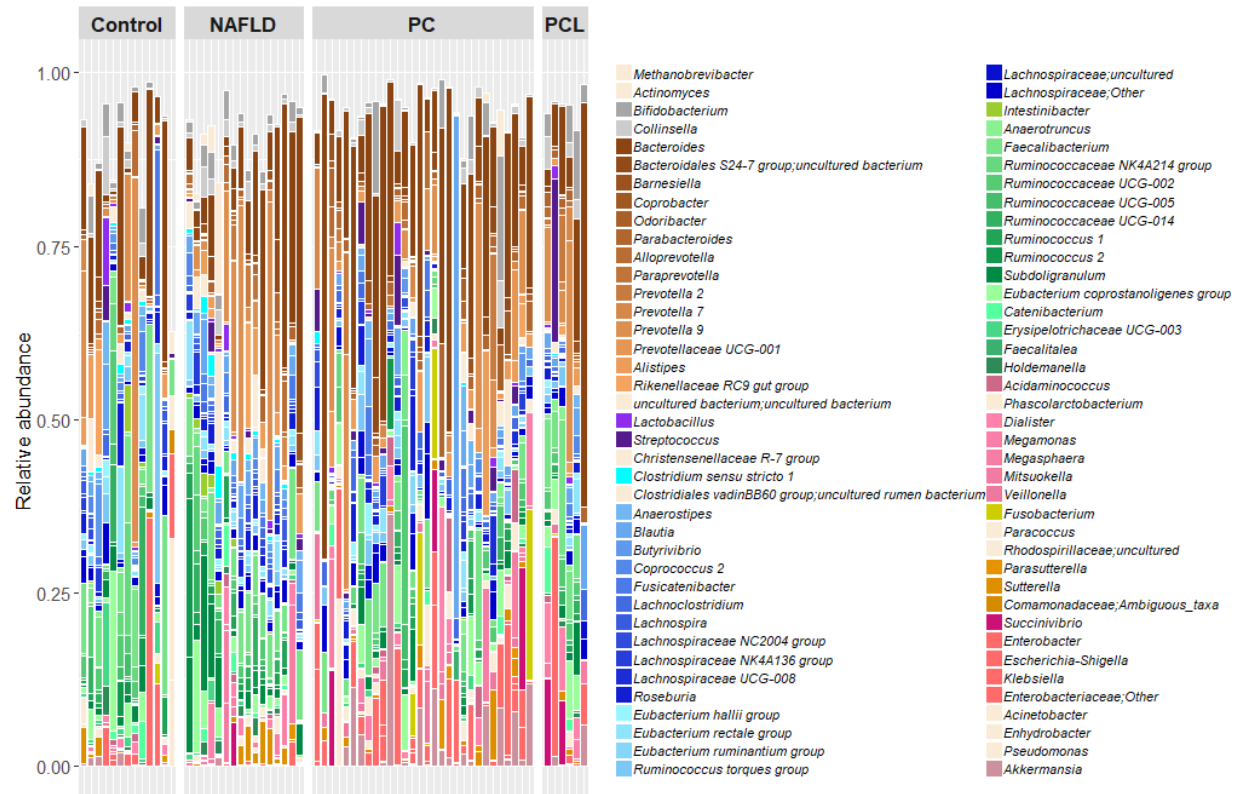

Figure S2. Basic microbiome characteristics across all patient groups. A. Microbial diversity (alpha diversity, measured by Shannon index); B. The ratio between total abundance of the Bacteroidetes phylum to total abundance of the Firmicutes phylum. Dunns test was used for to test for significance across all groups; significant ( $p < 0.05$ ) and borederline-significant ( $p < 0.1$ ) results are marked in bold.

A.

| Comparisons                 | Z statistic         | adjusted P value   |
|-----------------------------|---------------------|--------------------|
| <b>Control - FattyLiver</b> | <b>-1.663622469</b> | <b>0.048093949</b> |
| Control - IPMN              | 0.002747691         | 0.498903831        |
| FattyLiver - IPMN           | 1.300449415         | 0.096723492        |
| Control - PC                | 0.545634602         | 0.292658567        |
| <b>FattyLiver - PC</b>      | <b>2.591869416</b>  | <b>0.0047728</b>   |
| IPMN - PC                   | 0.402092429         | 0.343808002        |

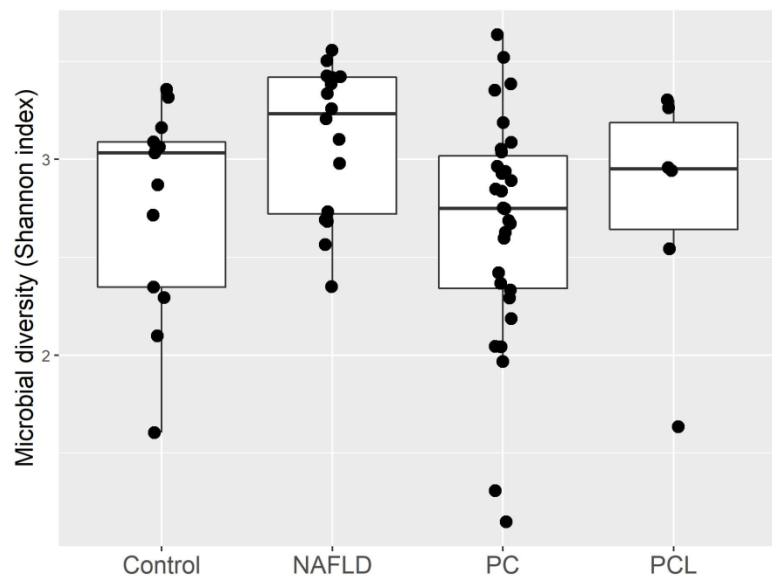

B.

| Comparisons         | Z statistic         | adjusted P value   |
|---------------------|---------------------|--------------------|
| Control - NAFLD     | -0.705490331        | 0.240252574        |
| <b>Control - PC</b> | <b>-2.213577502</b> | <b>0.013428928</b> |
| <b>NAFLD - PC</b>   | <b>-1.523372851</b> | <b>0.063832725</b> |
| Control - PCL       | -0.685548872        | 0.246498816        |
| NAFLD - PCL         | -0.156514266        | 0.437813838        |
| PC - PCL            | 0.886968594         | 0.187547905        |

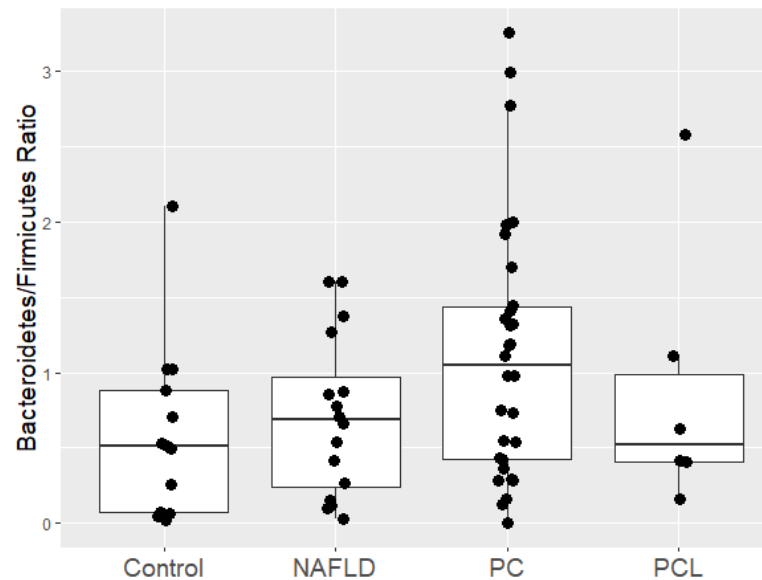

Figure S3. Hierarchical clustering of all samples according to similarity in microbial composition. Distance matrices based on either abundance-weighted (left) or unweighted (right) UniFrac matrices. UPGMA method was used for clustering; dendrogram labels are color-coded according to the participants clinical status, as in Figures 1 and 4.

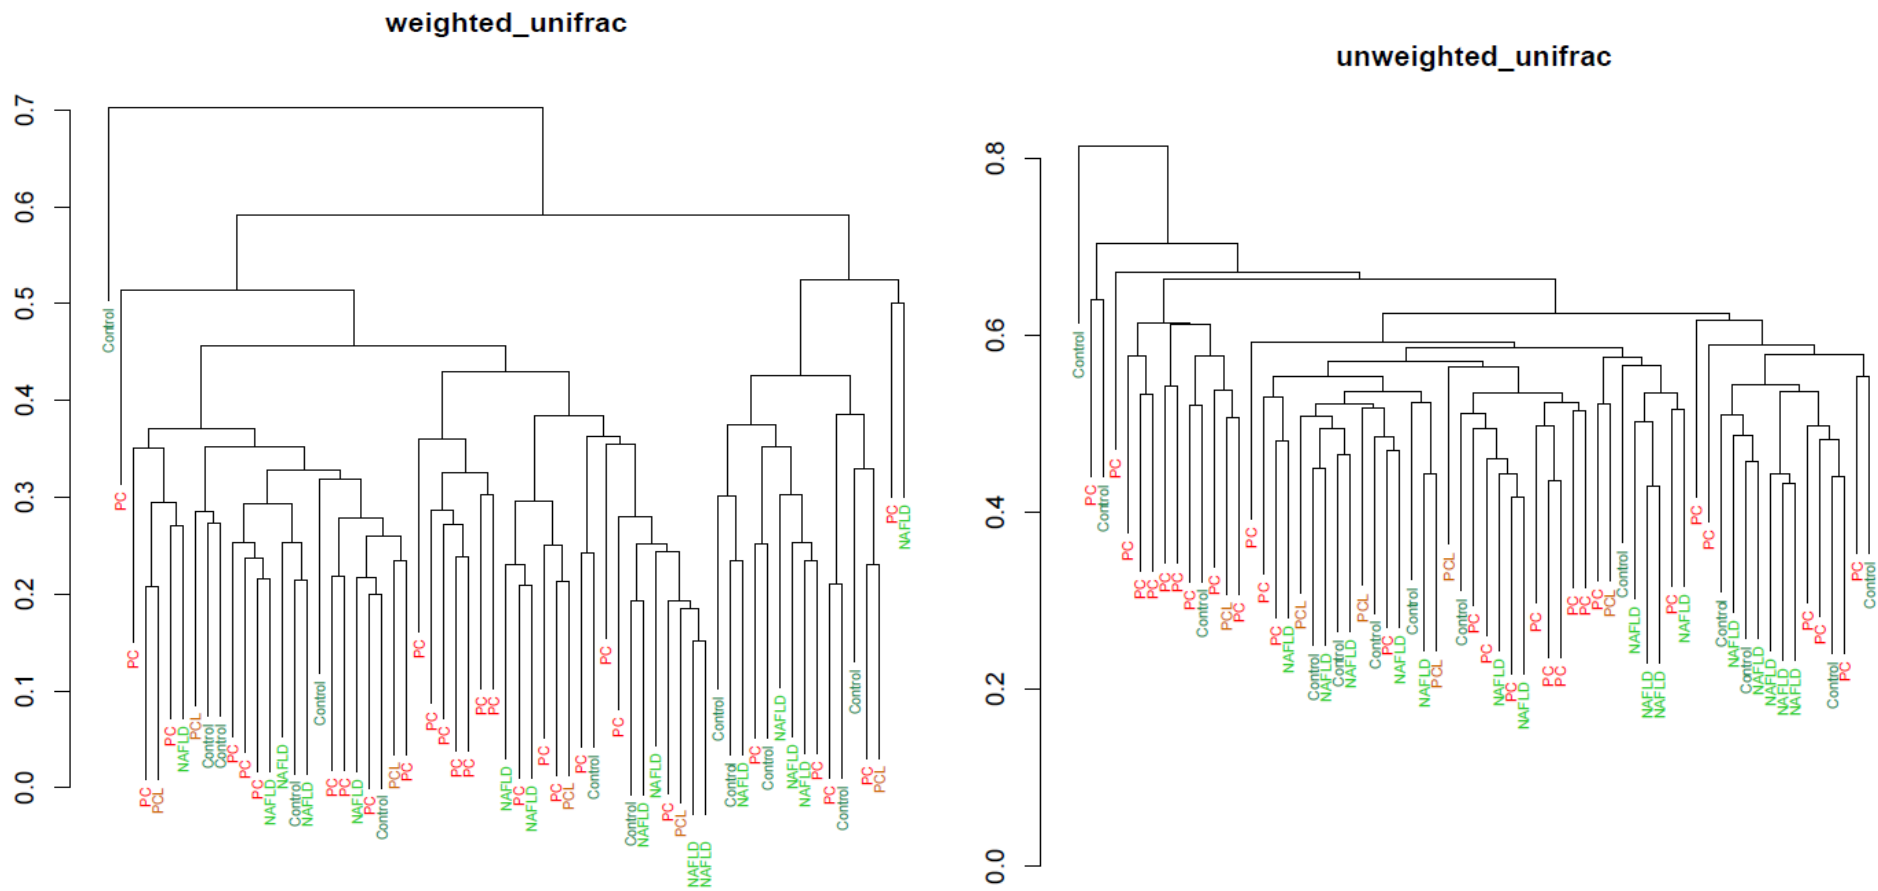

Figure S4. Bacterial taxa identified by LEfSe as differentiating between PC patients (red) and NAFLD control subjects (green).

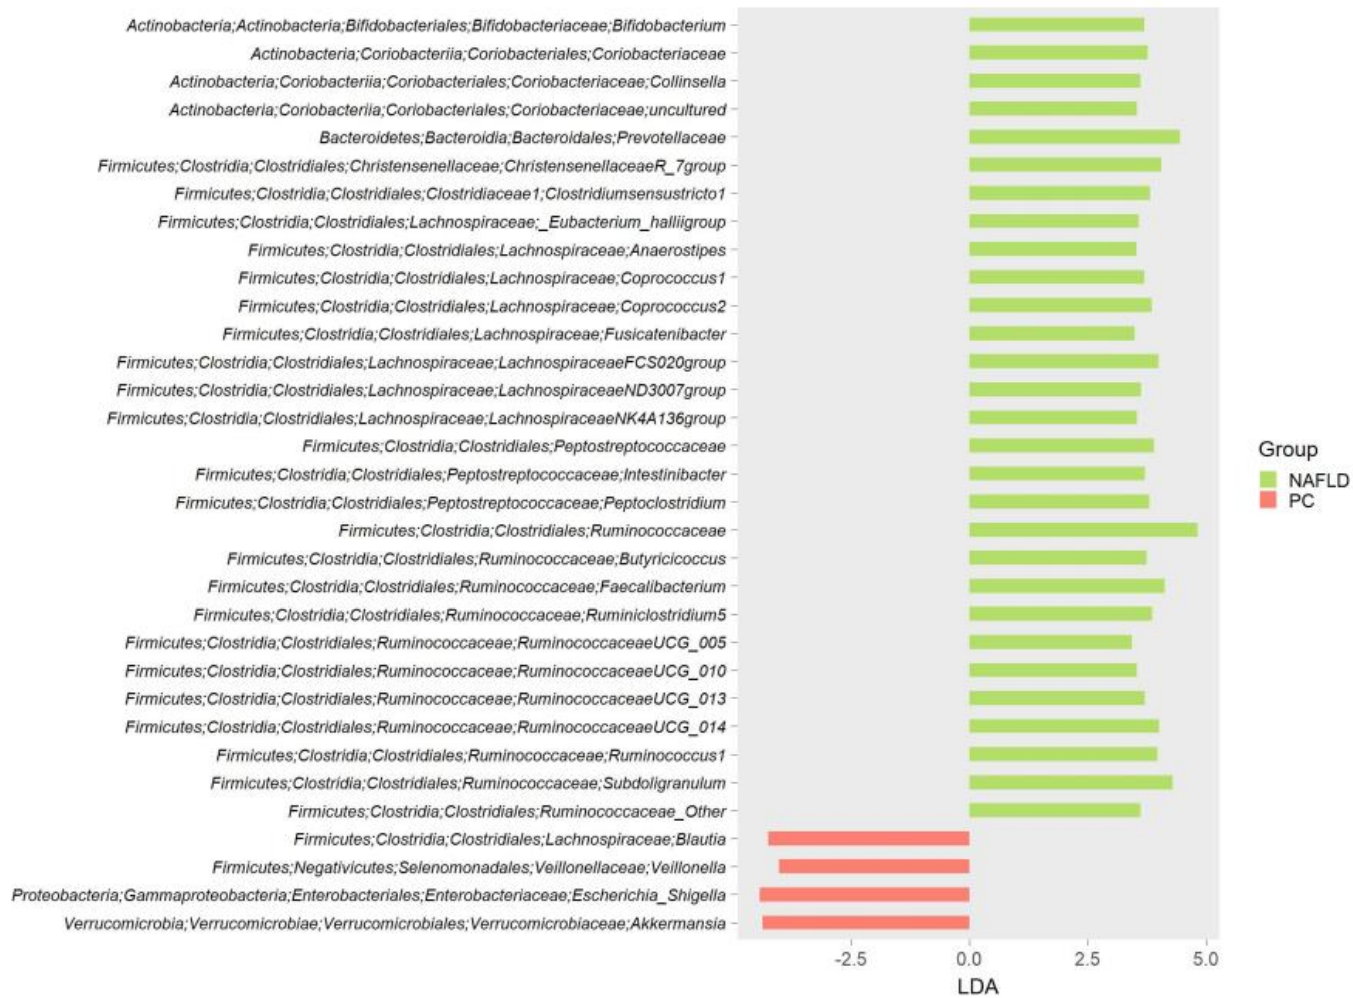

Figure S5. Inter-group and intra-group patterns of all genera identified by LEfSe as differentiating between PC patients and health controls.

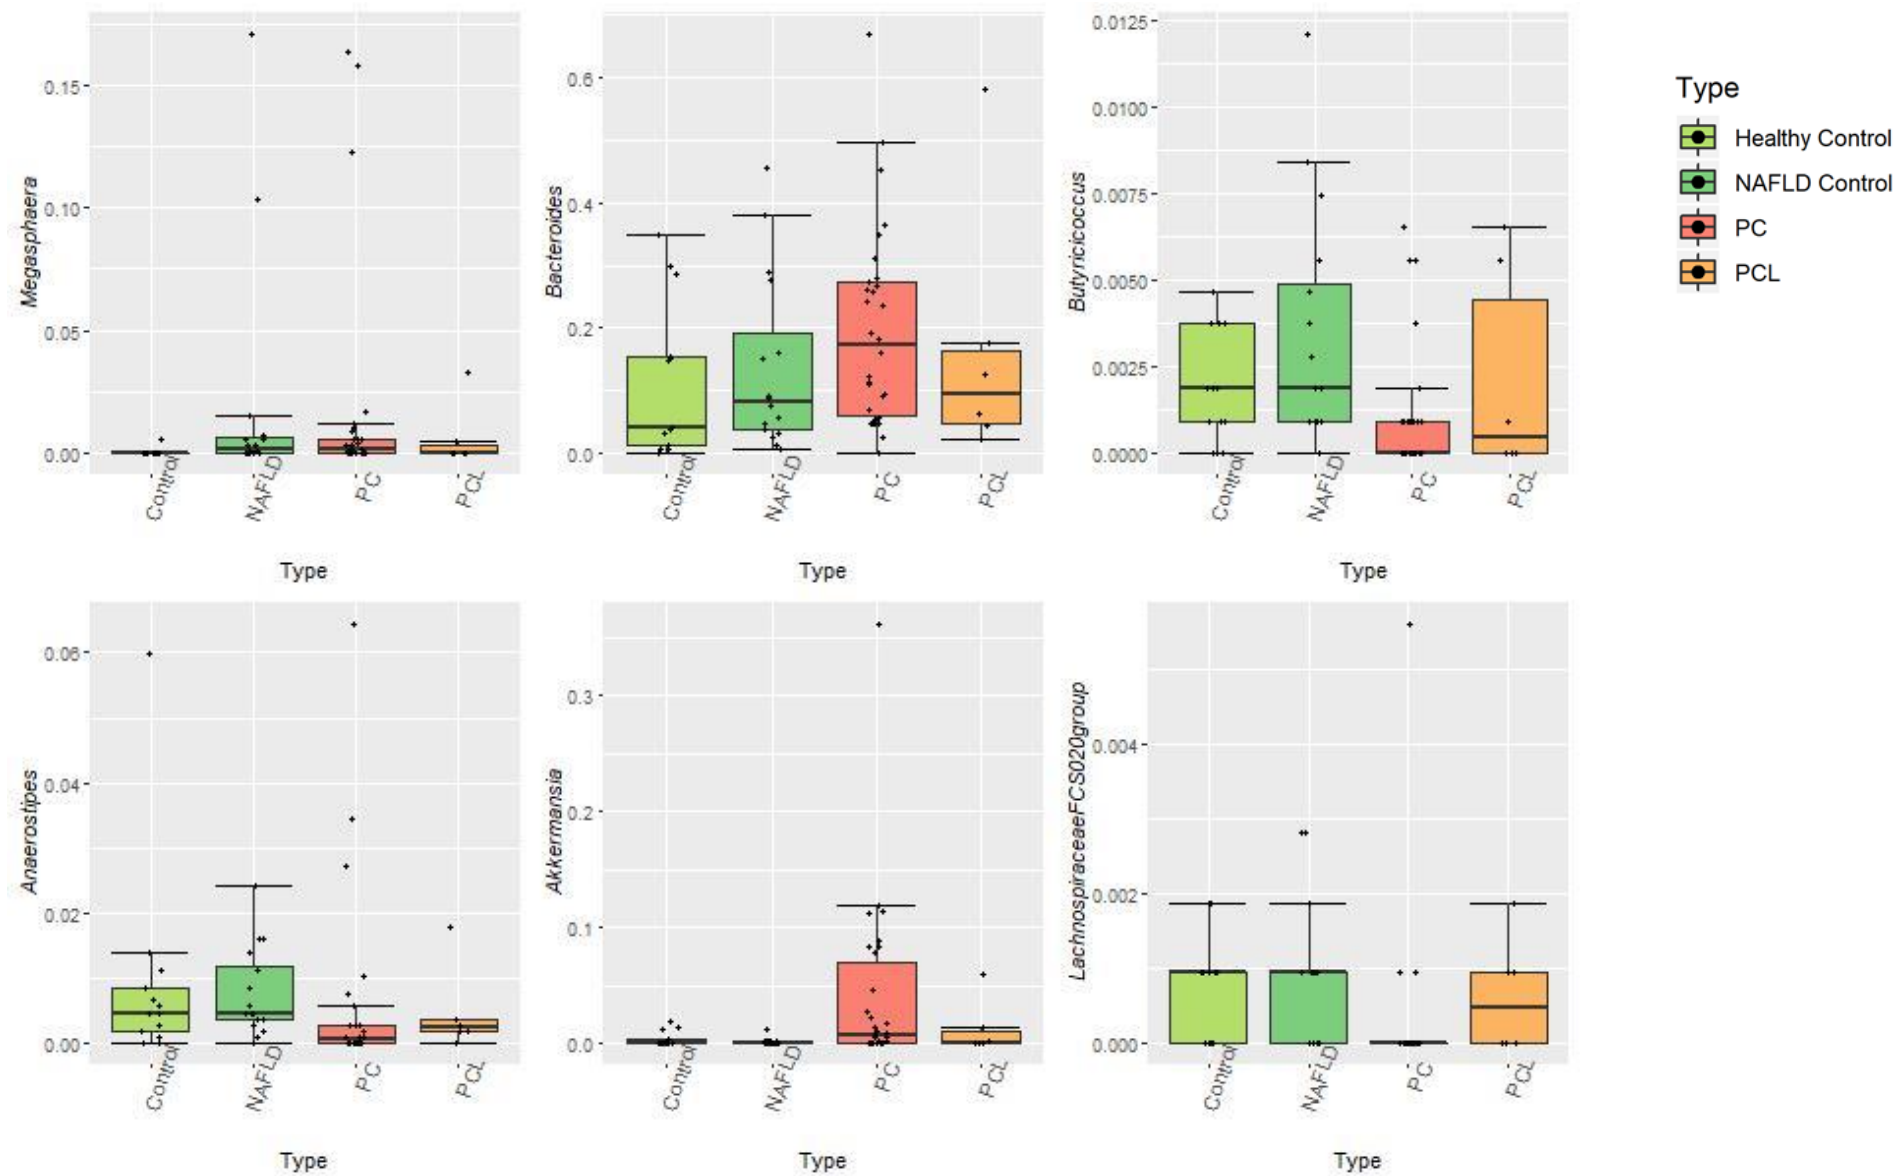

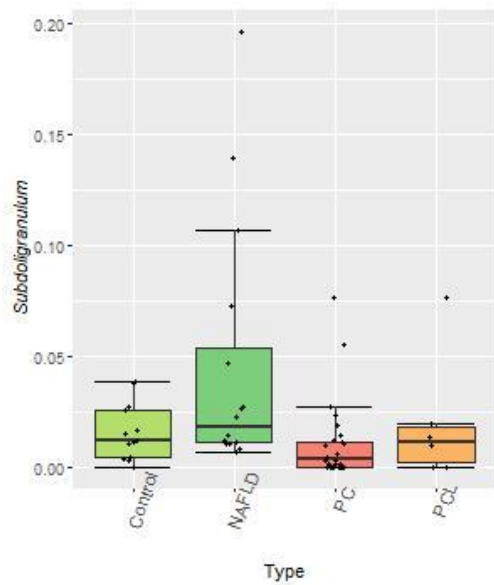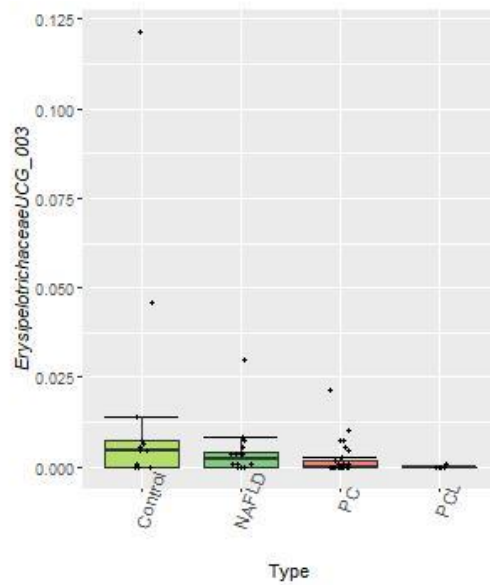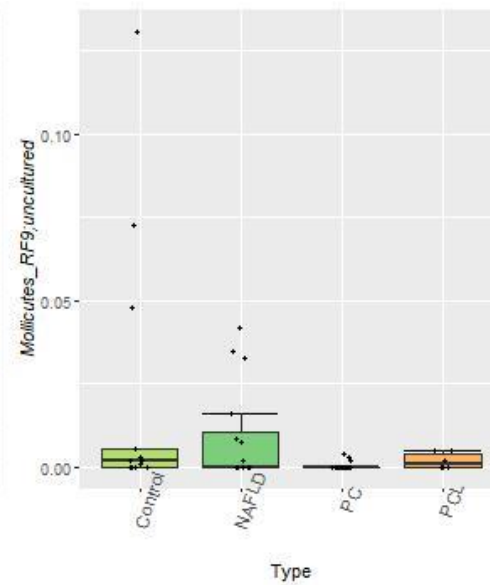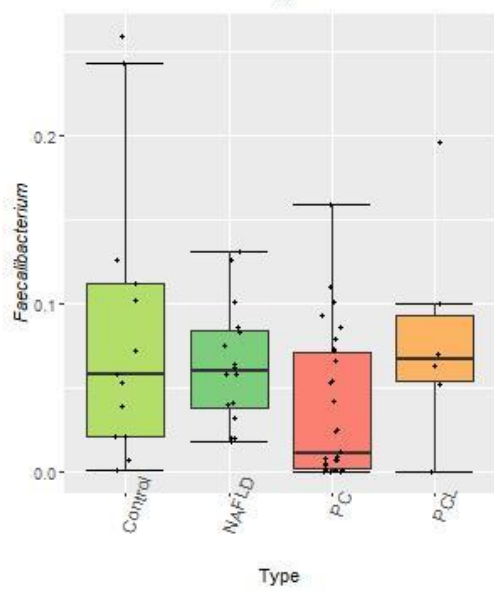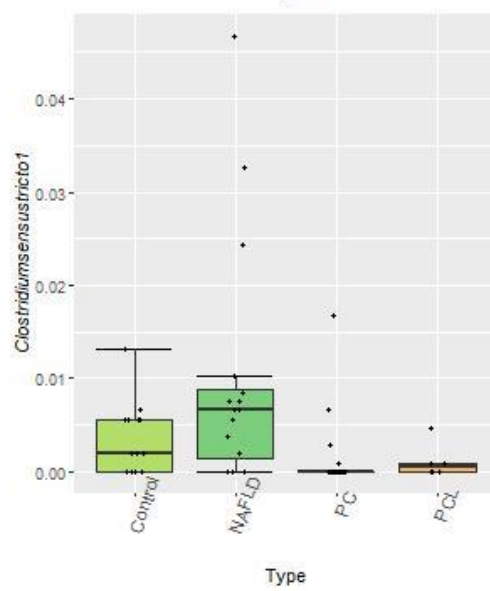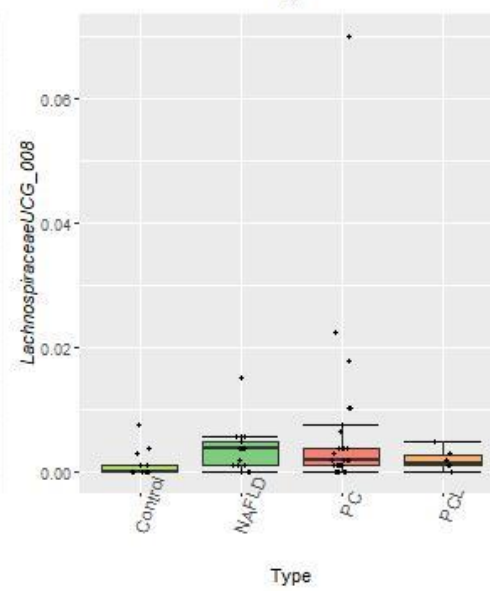



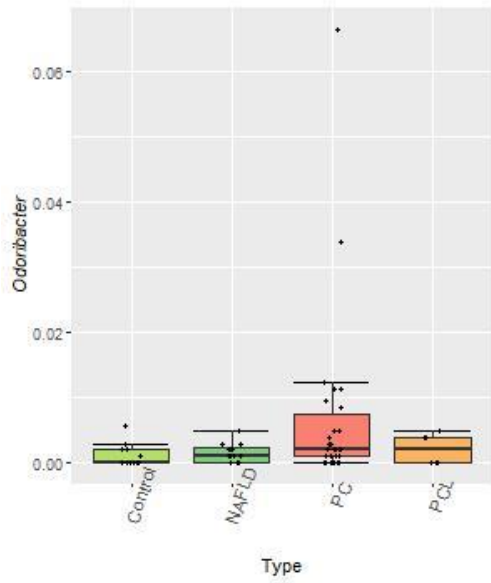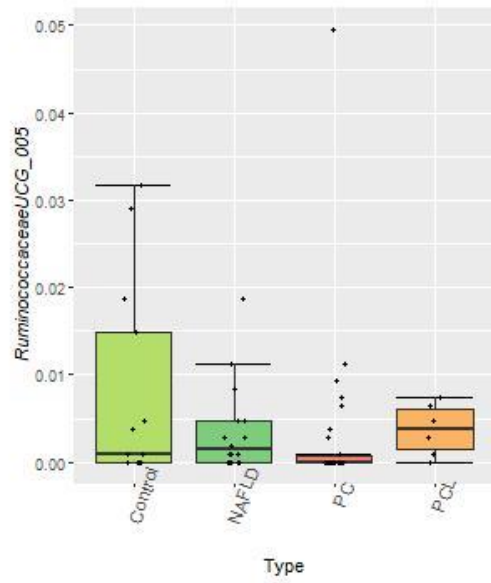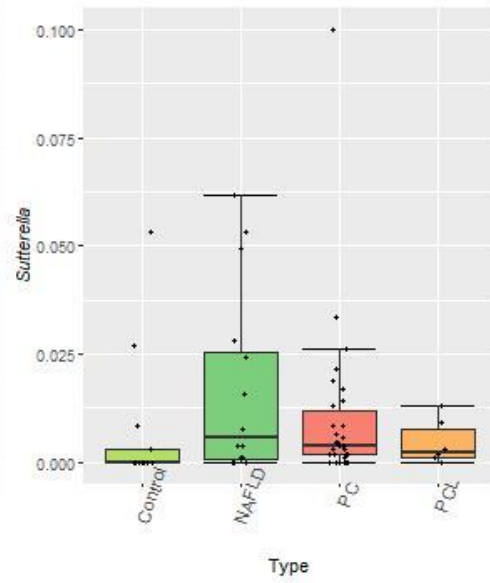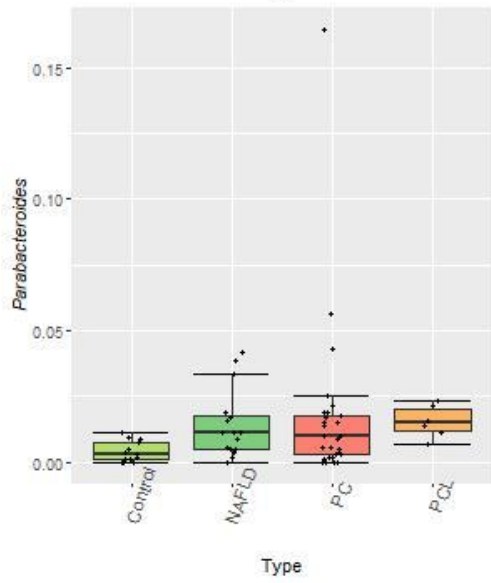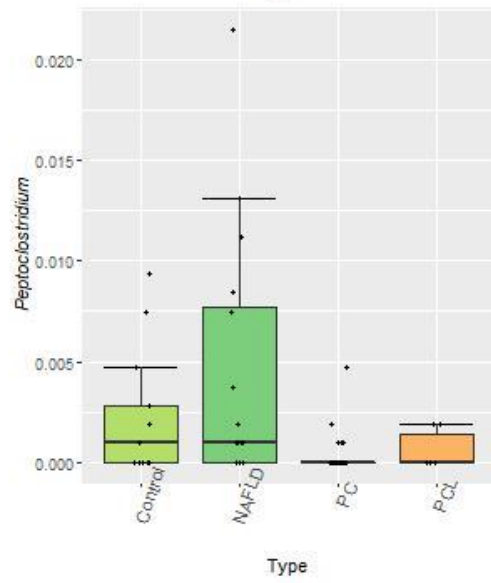

Supplement: 41598_2019_53041_MOESM1_ESM.pdf [file 41598_2019_53041_MOESM1_ESM.pdf]
